# Supplementary material for: Transcriptomic Characterization of Nitrate-Enhanced Stevioside Glycoside Synthesis in Stevia (Stevia rebaudiana) Bertoni
Source: MDPI journal article supplement (doi:10.3390/ijms22168549), 2021-08-09
Supplement: s1 [file s1]

## Supplemental Material

**Supplemental Table S1** Summary of the transcriptomic data

| Item                                  | A-N        | N-N        |
|---------------------------------------|------------|------------|
| Raw reads(bp)                         | 42,888,959 | 51,454,116 |
| Clean reads(bp)                       | 21,444,479 | 25,727,058 |
| Clean bases(G)                        | 6.41       | 7.70       |
| Clean GC(%)                           | 46.19      | 45.42      |
| Clean Q30(%)                          | 95.37      | 95.27      |
| Total mapped                          | 60.45      | 76.30      |
| Uniquely mapped                       | 48.83      | 62.55      |
| Multiply mapped                       | 11.62      | 13.75      |
| Unmapped reads                        | 26.47      | 33.96      |
| Number of detected genes in libraries | 35,424     | 36,063     |

A-N: ammonium nitrogen; N-N: nitrate nitrogen

**Supplemental Table S2** Summary of the relationship between WRKY transcription factors and plant terpenoid metabolism as indicated in previous publications

| Plant species              | Tissue      | Terpenoid           | WRKY TF(s)            | Effect   | References                        |
|----------------------------|-------------|---------------------|-----------------------|----------|-----------------------------------|
| <i>Artemisia annua</i>     | Trichome    | Artemisinin         | AaWRKY1;<br>AaWRKY9   | Positive | Han et al. 2014; Fu et al. 2021   |
| <i>Conyza Blinii</i>       | Fruit       | Saponin             | CbWRKY24              | Positive | Sun et al. 2018                   |
| <i>Panax ginseng</i>       | Root        | Ginsenoside         | PgWRKY4x              | Positive | Yao et al. 2020                   |
| <i>Salvia miltiorrhiza</i> | Hairy roots | Tanshinone          | SmWRKY2<br>SmWRKY1    | Positive | Deng et al. 2019; Gao et al. 2018 |
| <i>Salvia Sclarea</i>      | Root        | Abietane diterpenes | AtWRKY18;<br>AtWRKY40 | Positive | Alfieri et al. 2018               |
| <i>Withania somnifera</i>  | Leaf        | Triterpenoids       | WsWRKY1               | Positive | Singh et al. 2017                 |

#### References

- Alfieri M, Vaccaro M C, Cappetta E, et al. Coactivation of MEP-biosynthetic genes and accumulation of abietane diterpenes in *Salvia sclarea* by heterologous expression of WRKY and MYC2 transcription factors. *Scientific Reports*, 2018, 8, 1-13.
- Cao W, Wang Y, Shi M, et al. Transcription factor *SmWRKY1* positively promotes the biosynthesis of tanshinones in *Salvia miltiorrhiza*. *Frontiers in Plant Science*, 2018, 9, 554.
- Deng C, Hao X, Shi M, et al. Tanshinone production could be increased by the expression of SmWRKY2 in *Salvia miltiorrhiza* hairy roots[J]. *Plant Science*, 2019, 284: 1-8.
- Fu X, Peng B, Hassani D, et al. *AaWRKY9* contributes to light - and jasmonate - mediated to regulate the biosynthesis of artemisinin in *Artemisia annua*. *New Phytologist*, 2021.
- Han J, Wang H, Lundgren A, et al. Effects of overexpression of *AaWRKY1* on artemisinin biosynthesis in transgenic *Artemisia annua* plants. *Phytochemistry*, 2014, 102: 89-96.
- Singh AK, Kumar SR, Dwivedi V, et al. A WRKY transcription factor from *Withania somnifera* regulates triterpenoid withanolide accumulation and biotic stress tolerance through modulation of phytosterol and defense pathways. *New Phytologist*, 2017, 215, 1115-1131.
- Sun W J, Zhan J Y, Zheng T R, et al. The jasmonate-responsive transcription factor *CbWRKY24* regulates terpenoid biosynthetic genes to promote saponin biosynthesis in *Conyza blinii* H. Lév. *Journal of Genetics*, 2018, 97, 1379-1388.
- Yao L, Wang J, Sun J, et al. A WRKY transcription factor, *PgWRKY4X*, positively regulates ginsenoside biosynthesis by activating squalene epoxidase transcription in *Panax ginseng*. *Industrial Crops and Products*, 2020, 154: 112671.

**Supplemental Table S3** Summary of the relationship between MYB transcription factors and plant terpenoid metabolism as indicated in previous publications

| Plant species       | Tissue      | Terpenoid                            | MYB TF(s)                       | Effect   | References                                                 |
|---------------------|-------------|--------------------------------------|---------------------------------|----------|------------------------------------------------------------|
| Artemisia annua     | Trichome    | Artemisinin                          | AaMYB17;<br>AtMYB61             | Positive | Qin et al. (2021);<br>Matías-Hernández et al. (2017)       |
| Artemisia annua     | Trichome    | Artemisinin                          | AaMYB15                         | Negative | Wu et al. 2021                                             |
| Citrus              | Leaf        | Limonoids                            | CiMYB42                         | Positive | Zhang et al. 2020                                          |
| Salvia miltiorrhiza | Hairy/roots | Tanshinone                           | SmMYB98;<br>SmMYB9b;<br>SmMYB36 | Positive | Hao et al. 2020;<br>Zhang et al. 2017;<br>Ding et al. 2017 |
| Spearmint           | Leaf        | Monoterpene                          | MsMYB                           | Negative | Reddy V A. 2017                                            |
| Tomato              | Leaf/fruit  | Beta-amyrin;<br>Terpene<br>volatiles | VvMYB5b;<br>SlMYB75             | Positive | Mahjoub et al. 2009;<br>Jian et al, 2019                   |
| Tomato              | Trichome    | Sesquiterpene                        | SlMYB75                         | Negative | Gong et al. 2021                                           |

#### References

- Ding K, Pei T, Bai Z, et al. *SmMYB36*, a novel R2R3-MYB transcription factor, enhances tanshinone accumulation and decreases phenolic acid content in *Salvia miltiorrhiza* hairy roots. **Scientific Reports**, 2017, 7, 1-15.
- Gong Z, Luo Y, Zhang W, et al. A SIMYB75-centred transcriptional cascade regulates trichome formation and sesquiterpene accumulation in tomato. **Journal of Experimental Botany**, 2021, 72, 3806-3820.
- Hao X, Pu Z, Cao G, et al. Tanshinone and salvianolic acid biosynthesis are regulated by *SmMYB98* in *Salvia miltiorrhiza* hairy roots. **Journal of Advanced Research**, 2020, 23, 1-12.
- Jian W, Cao H, Yuan S, et al. *SIMYB75*, an MYB-type transcription factor, promotes anthocyanin accumulation and enhances volatile aroma production in tomato fruits. **Horticulture Research**, 2019, 6, 1-15.
- Mahjoub A, Hernould M, Joubès J, et al. Overexpression of a grapevine R2R3-MYB factor in tomato affects vegetative development, flower morphology and flavonoid and terpenoid metabolism. **Plant Physiology and Biochemistry**, 2009, 47, 551-561.
- Matías-Hernández L, Jiang W, Yang K, et al. Aa MYB 1 and its orthologue *AtMYB61* affect terpene metabolism and trichome development in *Artemisia annua* and *Arabidopsis thaliana*. **The Plant Journal**, 2017, 90, 520-534.
- Qin W, Xie L, Li Y, et al. An R2R3-MYB transcription factor positively regulates the glandular secretory trichome initiation in *Artemisia annua* L. **Frontiers in Plant Science**, 2021, 12, 560.
- Reddy V A, Wang Q, Dhar N, et al. Spearmint R2R3-MYB transcription factor *MsMYB* negatively regulates monoterpene production and suppresses the expression of geranyl diphosphate synthase large subunit (*MsGPPS*. LSU). **Plant Biotechnology Journal**, 2017, 15, 1105-1119.
- Wu Z, Li L, Liu H, et al. *AaMYB15*, an R2R3-MYB TF in *Artemisia annua*, acts as a negative regulator of artemisinin biosynthesis. **Plant Science**, 2021, 308, 110920.
- Zhang J, Zhou L, Zheng X, et al. Overexpression of *SmMYB9b* enhances tanshinone concentration in *Salvia miltiorrhiza* hairy roots. **Plant Cell Reports**, 2017, 36, 1297-1309.
- Zhang P, Liu X, Yu X, et al. The MYB transcription factor *CiMYB42* regulates limonoids biosynthesis in citrus. **BMC Plant Biology**, 2020, 20, 1-12.

**Supplemental Table S4** The primers used for qRT-PCRs in this study

| <b>Gene</b>      | <b>Primers (forward primer, F and reverse primer, R) (5'-3')</b> | <b>Accession no.</b> |
|------------------|------------------------------------------------------------------|----------------------|
| <i>SrDXR</i>     | F:TCCGAACTCGTAACTGCACC<br>R:CAAGAGCTACCGCGGTCAAA                 | AJ429233.1           |
| <i>SrMDS</i>     | F:ACCGAAACACACAGTGAGCA<br>R:TGAGAGGGTATCCAGGCTCC                 | DQ631427             |
| <i>SrIDI</i>     | F:TTCATTGTGCGAGACGTTGC<br>R:TGAGTTGAGGGGCATATGTGG                | DQ989585             |
| <i>SrGGDPS</i>   | F:AAACACCAATCAAACCCATCAGAA<br>R:GAACCGAGGCGTCCAGAG               | DQ432013             |
| <i>SrKSI-1</i>   | F: GAAGAAGAGGTTGTGGAGGA<br>R: CCCGTCATCGTTTGCGTAA                | AF097310.1           |
| <i>ent-KAH</i>   | F: TGTTATCGTATCTCGGTCCTGAT<br>R: CTCCTTCCCTCGCCAATG              | DQ398871             |
| <i>SrUGT85C2</i> | F:CGAGCATCCCAATCAGAGAATC<br>R:CAGGCAGCAAGTGTCCAAT                | AY345978.1           |
| <i>SrUGT74G1</i> | F: TCTACTCATCCCATTCCCTTTACA<br>R: CCGCCTTCATCACAACCAT            | AY345982             |
| <i>SrUGT76G1</i> | F: CGAGCATCCCAATCAGAGAATC<br>R: CAGGCAGCAAGTGTCCAAT              | AY345978             |
| <i>ACTIN</i>     | F: CACCGAAGCACCTCTCAATC<br>R: CCATCTCCAGAATCCAACACAAT            | AF548026             |

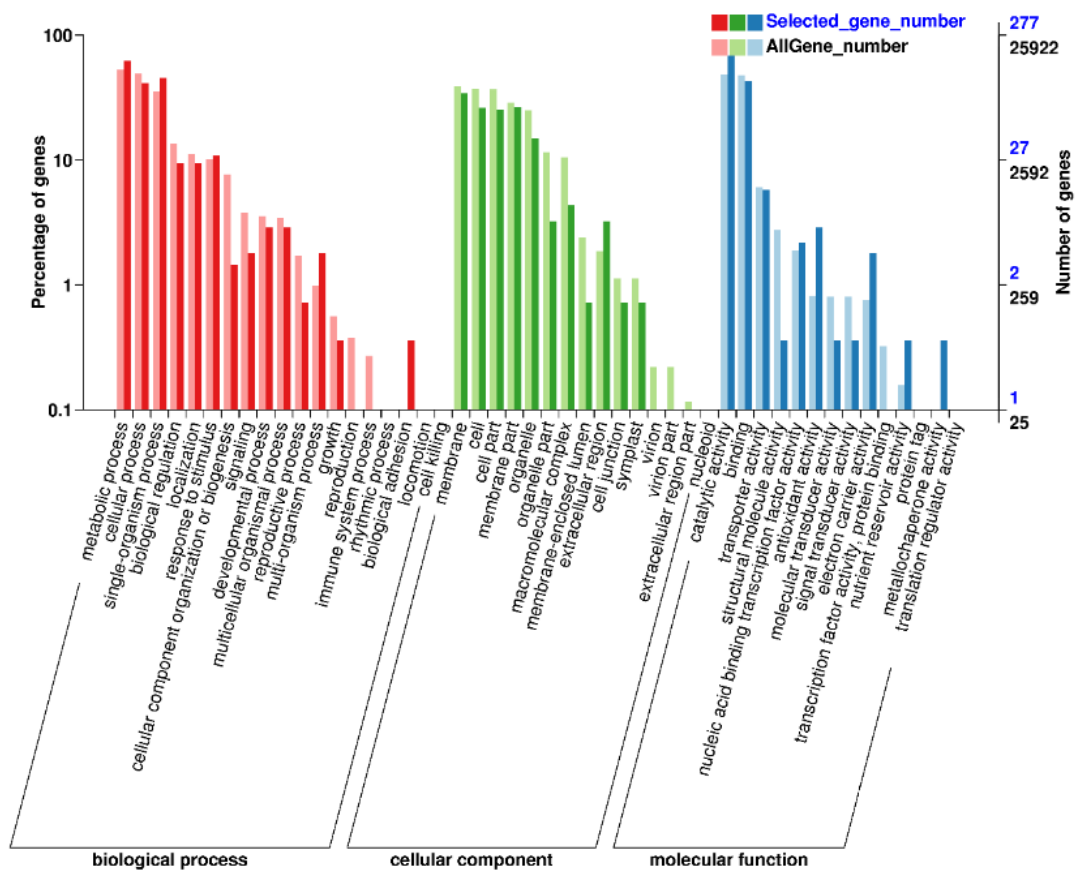

**Supplemental Fig. S1** Gene ontology annotation of the differentially expressed genes (DEGs) between the ammonium and nitrate fed stevia plant. The x-axis represents different subcategories while the y-axis indicates the number of genes with the corresponding GO terms.

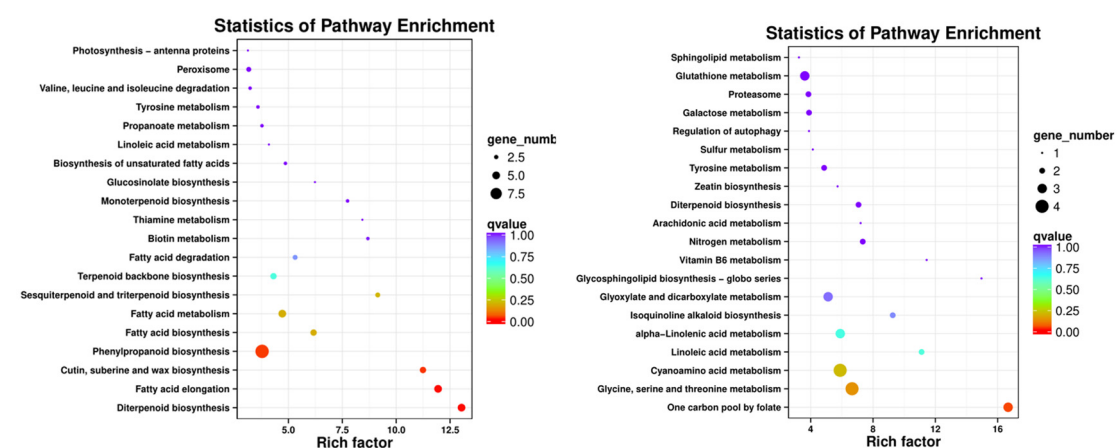

**Supplemental Fig. S2** Kyoto encyclopedia of genes and genomes (KEGG) enrichment analysis of the up-regulated (A) and down-regulated (B) DEGs between the ammonium and nitrate fed stevia plants.

The x-axis represents the enrichment factor while the y-axis indicates the name of KEGG pathway. The color of each circle refers to the q-value while the size indicates the gene numbers mapped to the pathway.

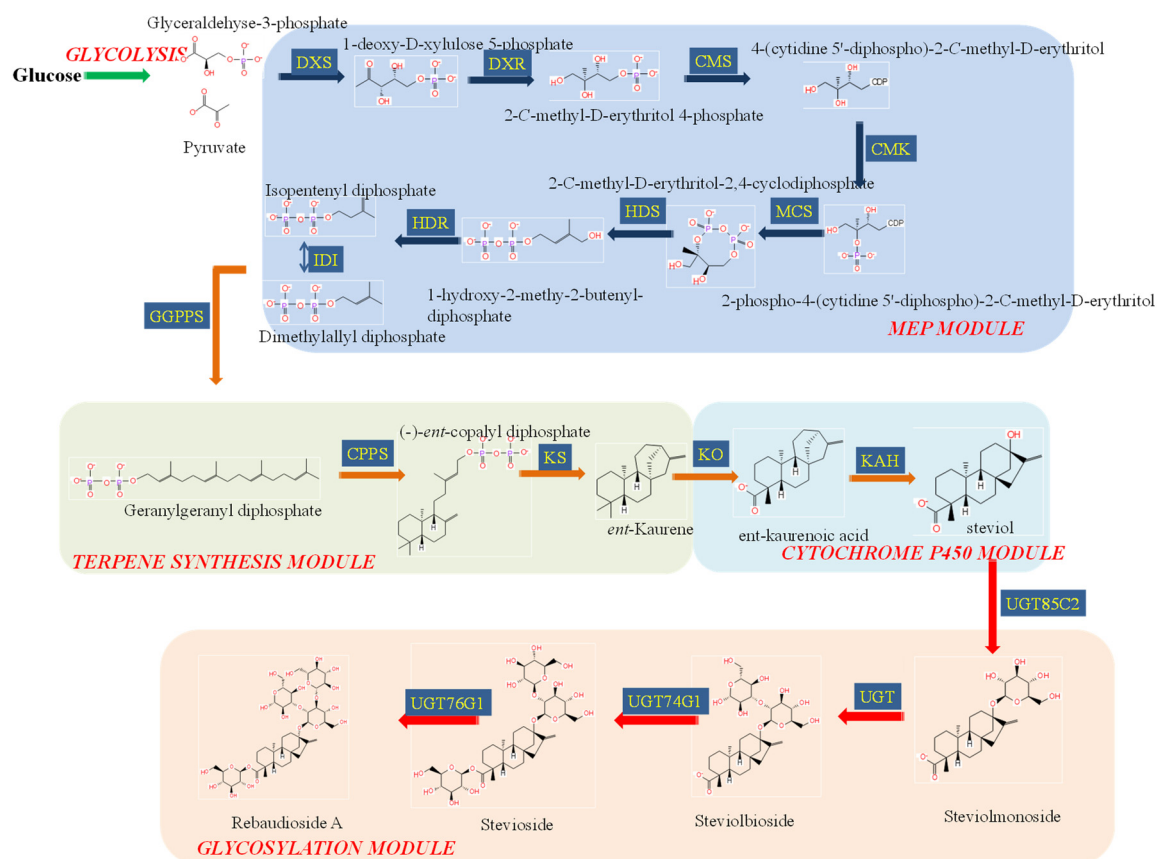

**Supplemental Fig. S3** Diagrammatic representation of the steviol glycoside (SG) biosynthesis pathway

Abbreviations: DXS (1-deoxy-D-xylulose-5-phosphate synthase); DXR (1-deoxy-D-xylulose 5-phosphate reductoisomerase), CMS (2-C-methyl-D-erythritol 4-phosphate cytidylyltransferase), CMK (4-diphosphocytidyl-2-C-methyl-D-erythritol kinase), MCS (2-C-methyl-D-erythritol 2,4-cyclodiphosphate synthase), HDS (4-hydroxy-3-methylbut-2-enyl diphosphate synthase), HDR (4-hydroxy-3-methylbut-2-enyl diphosphate reductase), IDI (isopentenyl-diphosphate delta-isomerase), GGPPS (geranylgeranyl pyrophosphate synthase), CPPS (ent-copalylpyrophosphate synthase), KS (ent-copalyl diphosphate synthase), KO (ent-kaurene oxidase), KAH (ent-kaurenoic acid hydroxylase), UGT85C2 (UDP-glycosyltransferase 85C2), UGT74G1 (UDP-glycosyltransferase 74G1), UGT76G1 (UDP-glycosyltransferase 76G1).
